# Supplementary material for: Daylight exposure modulates bacterial communities associated with household dust
Source: Microbiome. 2018 Oct 18;6:175. doi: 10.1186/s40168-018-0559-4 (PMC6193304; doi:10.1186/s40168-018-0559-4)
Supplement: Supplementary file 2 — Table S1. Table describing the range of parameter values considered for sampling model simulations. (XLSX 29 kb) [file 40168_2018_559_MOESM2_ESM.xlsx]

## Sheet: Sheet1
Parameter	Description	Range
S	Number of sequence variants	[500, 1000]
μ	Mean of the Lognormal SAD	[3, 5]
σ	Standard deviation of the Lognormal SAD	[1, 2]
λ	Maximum viability	[0.075, 0.75]
ϕ	Minumum viability	[0.001, 0.05]
k	Steepness of α(χi)	[-5e-3, -5e-4]
χ0	Half-saturation of α(χi)	[1e2, 2.5e3]
