# Supplementary material for: Daylight exposure modulates bacterial communities associated with household dust
Source: Microbiome. 2018 Oct 18;6:175. doi: 10.1186/s40168-018-0559-4 (PMC6193304; doi:10.1186/s40168-018-0559-4)
Supplement: Supplementary file 3 — Table S2. Table describing the taxonomy of RSVs identified by sLDA analysis. (XLSX 10 kb) [file 40168_2018_559_MOESM3_ESM.xlsx]

## Sheet: table-s2
phylum	class	order	family	genus
Acidobacteria	Blastocatellia	Blastocatellales	Blastocatellaceae_(Subgroup_4)	Stenotrophobacter
Acidobacteria	Blastocatellia	Blastocatellales	Blastocatellaceae_(Subgroup_4)	NA
Actinobacteria	NA	NA	NA	NA
Actinobacteria	Acidimicrobiia	Acidimicrobiales	NA	NA
Actinobacteria	Acidimicrobiia	Acidimicrobiales	NA	NA
Actinobacteria	Acidimicrobiia	Acidimicrobiales	NA	NA
Actinobacteria	Acidimicrobiia	Acidimicrobiales	NA	NA
Actinobacteria	Acidimicrobiia	Acidimicrobiales	NA	NA
Actinobacteria	Acidimicrobiia	Acidimicrobiales	NA	NA
Actinobacteria	NA	NA	NA	NA
Actinobacteria	Actinobacteria	Pseudonocardiales	Pseudonocardiaceae	Saccharopolyspora
Actinobacteria	Actinobacteria	Pseudonocardiales	Pseudonocardiaceae	Saccharopolyspora
Actinobacteria	Actinobacteria	Pseudonocardiales	Pseudonocardiaceae	Saccharopolyspora
Actinobacteria	Actinobacteria	Pseudonocardiales	Pseudonocardiaceae	Saccharopolyspora
Actinobacteria	Actinobacteria	Pseudonocardiales	Pseudonocardiaceae	Saccharopolyspora
Actinobacteria	Actinobacteria	NA	NA	NA
Actinobacteria	Actinobacteria	Pseudonocardiales	Pseudonocardiaceae	Saccharopolyspora
Actinobacteria	Actinobacteria	Pseudonocardiales	Pseudonocardiaceae	Saccharopolyspora
Actinobacteria	Actinobacteria	Pseudonocardiales	Pseudonocardiaceae	NA
Actinobacteria	Actinobacteria	Pseudonocardiales	Pseudonocardiaceae	NA
Actinobacteria	Actinobacteria	Pseudonocardiales	Pseudonocardiaceae	NA
Actinobacteria	Actinobacteria	Pseudonocardiales	Pseudonocardiaceae	Saccharopolyspora
Actinobacteria	Actinobacteria	Pseudonocardiales	Pseudonocardiaceae	Saccharopolyspora
Actinobacteria	Actinobacteria	Pseudonocardiales	Pseudonocardiaceae	Saccharopolyspora
Actinobacteria	Actinobacteria	Pseudonocardiales	Pseudonocardiaceae	Saccharopolyspora
Actinobacteria	Actinobacteria	NA	NA	NA
Actinobacteria	Actinobacteria	Pseudonocardiales	Pseudonocardiaceae	Saccharopolyspora
Actinobacteria	Actinobacteria	Pseudonocardiales	Pseudonocardiaceae	Saccharopolyspora
Actinobacteria	Actinobacteria	Pseudonocardiales	Pseudonocardiaceae	Saccharopolyspora
Actinobacteria	Actinobacteria	Pseudonocardiales	Pseudonocardiaceae	Saccharopolyspora
Actinobacteria	Actinobacteria	Pseudonocardiales	Pseudonocardiaceae	Saccharopolyspora
Actinobacteria	Actinobacteria	Pseudonocardiales	Pseudonocardiaceae	Saccharopolyspora
Actinobacteria	Actinobacteria	Pseudonocardiales	Pseudonocardiaceae	Saccharopolyspora
Actinobacteria	Actinobacteria	Pseudonocardiales	Pseudonocardiaceae	Pseudonocardia
Actinobacteria	Actinobacteria	Pseudonocardiales	Pseudonocardiaceae	Pseudonocardia
Actinobacteria	Actinobacteria	Pseudonocardiales	Pseudonocardiaceae	Saccharopolyspora
Actinobacteria	Actinobacteria	Micrococcales	NA	NA
Actinobacteria	Actinobacteria	Propionibacteriales	Nocardioidaceae	NA
Bacteroidetes	Cytophagia	Cytophagales	Cytophagaceae	Hymenobacter
Bacteroidetes	Cytophagia	Cytophagales	Cytophagaceae	Hymenobacter
Bacteroidetes	Sphingobacteriia	Sphingobacteriales	Chitinophagaceae	NA
Bacteroidetes	Sphingobacteriia	Sphingobacteriales	Chitinophagaceae	NA
Bacteroidetes	Cytophagia	Cytophagales	NA	NA
Bacteroidetes	NA	NA	NA	NA
Bacteroidetes	Cytophagia	Cytophagales	NA	NA
Bacteroidetes	Sphingobacteriia	Sphingobacteriales	Sphingobacteriaceae	Pedobacter
Bacteroidetes	Sphingobacteriia	Sphingobacteriales	Chitinophagaceae	NA
Bacteroidetes	Sphingobacteriia	Sphingobacteriales	Chitinophagaceae	Flavisolibacter
Firmicutes	Bacilli	Bacillales	Staphylococcaceae	Staphylococcus
Firmicutes	Bacilli	Bacillales	Staphylococcaceae	Staphylococcus
Firmicutes	Bacilli	Bacillales	Staphylococcaceae	Staphylococcus
Firmicutes	Bacilli	Bacillales	Staphylococcaceae	Staphylococcus
Firmicutes	Bacilli	Bacillales	Staphylococcaceae	Staphylococcus
Firmicutes	Bacilli	Bacillales	Staphylococcaceae	Staphylococcus
Firmicutes	Bacilli	Bacillales	Staphylococcaceae	Staphylococcus
Firmicutes	Bacilli	Bacillales	Staphylococcaceae	Staphylococcus
Firmicutes	Bacilli	Bacillales	Staphylococcaceae	Staphylococcus
Firmicutes	Bacilli	Bacillales	Staphylococcaceae	Staphylococcus
Firmicutes	Bacilli	Bacillales	Staphylococcaceae	Staphylococcus
Firmicutes	Bacilli	Bacillales	Staphylococcaceae	Staphylococcus
Firmicutes	Bacilli	Bacillales	Staphylococcaceae	Staphylococcus
Gemmatimonadetes	Gemmatimonadetes	Gemmatimonadales	Gemmatimonadaceae	NA
